# Supplementary material for: Density, Distribution, and Composition of Immune Infiltrates Correlate with Survival in Merkel Cell Carcinoma
Source: Oxford University Press journal article supplement (doi:10.1158/1078-0432.ccr-16-0392), 2016-05-11
Supplement: 10780432ccr160392-sup-162338_2_supp_0_r6rrxq.docx [file 10780432ccr160392-sup-162338_2_supp_0_r6rrxq.docx]

**Supplemental Figure 1. Age, gender, MCPyV status and perineural invasion do not correlate with disease specific survival in MCC.** (A) Kaplan-Meier plot for age and disease specific survival applying a cut off of 71y. (B) Kaplan-Meier plot for sex and disease specific survival. (C) Kaplan-Meier plot for MCPyV status and disease specific survival. (D) Kaplan-Meier plot for perineural invasion and disease specific survival.

**Supplemental Figure 2. Kaplan Meier analysis of survival among MCPyV+ and MCPyV- patients according to the density, composition and distribution of the inflammatory infiltrate.** Survival according to CD3 density/mm2 at the periphery (left), center (middle), and hotspot (right) in MCPyV+ MCCs (**Top row**) versus MCPyV- MCCs (**Second row**). Survival according to CD8 density/mm2 at the periphery (left), center (middle), and hotspot (right) in MCPyV+ MCCs. (**Third Row)** versus MCPyV- MCCs (**Bottom row**). **Legend**: Patients with cell densities above the median indicated with a dashed line ( ) and patients with cell density below the median indicated with a solid line ( ).
